# Supplementary material for: Co-targeting of IGF1R/mTOR pathway by miR-497 and miR-99a impairs hepatocellular carcinoma development
Source: PubMed Central journal article supplement (PMC5564620; doi:10.18632/oncotarget.18207), 2017-05-24
Supplement: oncotarget-08-47984-s001.pdf [file oncotarget-08-47984-s001.pdf]

# Co-targeting of IGF1R/mTOR pathway by miR-497 and miR-99a impairs hepatocellular carcinoma development

## SUPPLEMENTARY MATERIALS

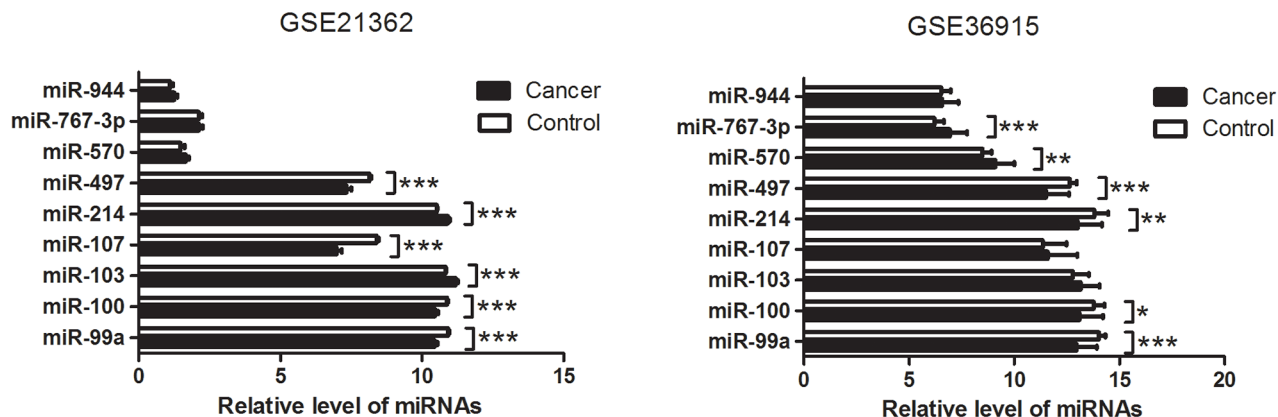

**Supplementary Figure 1: Common miRNAs of both IGF1R and mTOR expressed in GSE21362 and 36915.** N=146 and 89, respectively; \*P<0.05, \*\*P<0.005, \*\*\*P<0.001, compared to control.

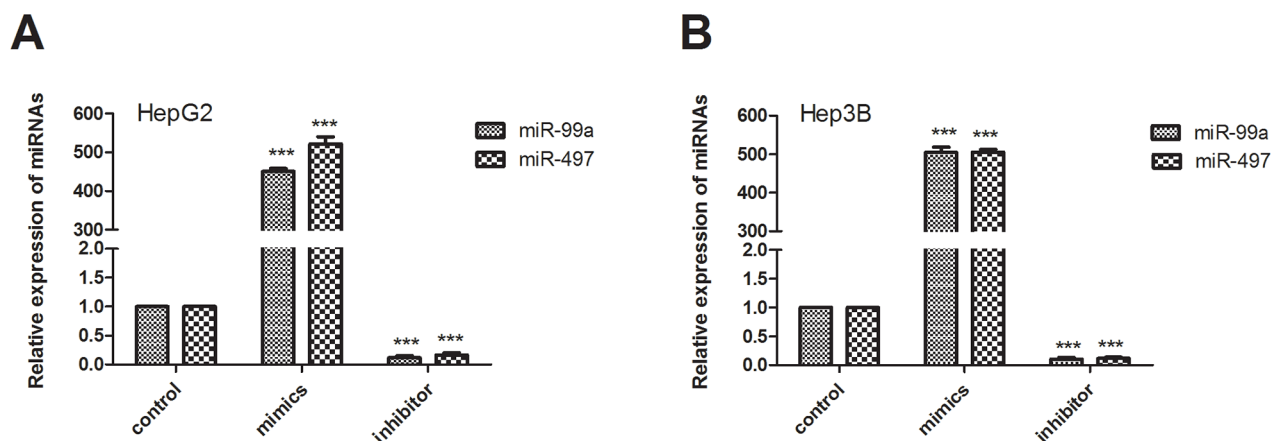

**Supplementary Figure 2: The expression level of miRNAs in HepG2 and Hep3B cells.** The expressions of miR-99a and miR-497 in control group were both set to 1. miR-99a and miR-497 mimics enhance the corresponding miRNA expression, while miR-99a and miR-497 inhibitors can repress the expression in (A) HepG2 and (B) Hep3B cells. \*\*\*P<0.001, compared to control.

**Supplementary Table 1: Predicted target miRNAs and common miRNAs of IGF1R and mTOR in 10 popular miRNA databases.**

See Supplementary File 1
